# Supplementary material for: Agro-Morphological and Biochemical Characterization of Korean Sorghum (Sorghum bicolor (L.) Moench) Landraces
Source: MDPI journal article supplement (doi:10.3390/agronomy12112898), 2022-11-20
Supplement: s1 [file s1]

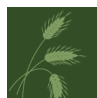

Supplementary files

# Agro-Morphological and Biochemical Characterization of Korean Sorghum (*Sorghum bicolor* (L.) Moench) Landraces

Sukyeung Lee <sup>1</sup>, Yu-Mi Choi <sup>1</sup>, Myoung-Jae Shin <sup>1</sup>, Hyemyeong Yoon <sup>1</sup>, Xiaohan Wang <sup>1</sup>, Yoonjung Lee <sup>1</sup>, Jungyoon Yi <sup>1</sup> and Kebede Taye Desta <sup>1,\*</sup>

<sup>1</sup> National Agrobiodiversity Center, National Institute of Agricultural Sciences, Rural Development Administration, Jeonju 54874, Republic of Korea

**Figure S1.** Representative sorghum seed samples.

**Table S1.** Qualitative agronomic properties of sorghum genotypes cultivated in Korea.

**Table S2.** Statistical data of analysis of variance indicating the variation in biochemical and agronomical traits between sorghum genotypes.

**Table S3.** Variation of metabolite contents and antioxidant activities in sorghum landraces according to the collection area.

**Table S4.** Variation of metabolite contents and antioxidant activities in sorghum landraces according to seed color and seed weight.

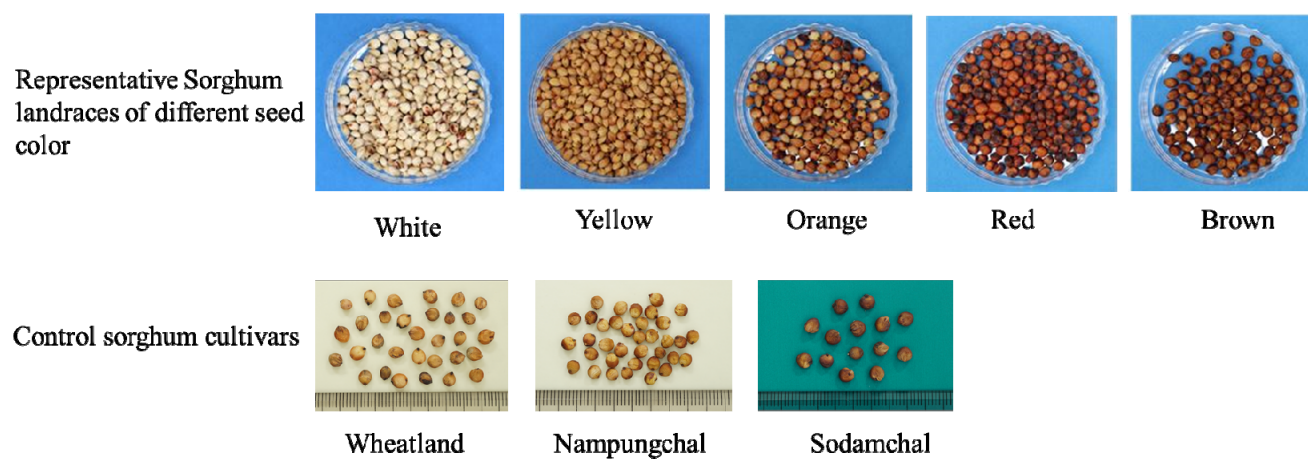

**Figure S1.** Representative sorghum seed samples.

**Table S1.** Qualitative agronomic properties of sorghum genotypes cultivated in Korea.

| IT-Number | Collection province | Endosperm type | Panicle type        | Panicle density | Seed color |
|-----------|---------------------|----------------|---------------------|-----------------|------------|
| 28365     | Gyeongsangbuk-do    | Glutinous      | Compact             | Dense           | Orange     |
| 100010    | Gyeongsangnam-do    | Glutinous      | Extremely spreading | Medium          | White      |
| 100018    | Gyeongsangnam-do    | Glutinous      | Extremely spreading | Medium          | White      |
| 100024    | Jeollanam-do        | Glutinous      | Extremely spreading | Dense           | Orange     |
| 100045    | Gangwon-do          | Glutinous      | Spreading           | Dense           | Brown      |
| 100046    | Gangwon-do          | Glutinous      | Spreading           | Dense           | Brown      |
| 100047    | Gangwon-do          | Glutinous      | Compact             | Dense           | Orange     |
| 100073    | Jeollanam-do        | Glutinous      | Extremely spreading | Dense           | Orange     |
| 100074    | Chungcheongbuk-do   | Glutinous      | Compact             | Dense           | Orange     |
| 100090    | Jeollanam-do        | Common         | Extremely spreading | Medium          | Orange     |
| 100143    | Jeollanam-do        | Glutinous      | Spreading           | Dense           | Yellow     |
| 100177    | Jeollanam-do        | Glutinous      | Extremely spreading | Dense           | Orange     |
| 103099    | Jeollanam-do        | Glutinous      | Medium              | Dense           | Brown      |
| 103452    | Jeollabuk-do        | Glutinous      | Extremely spreading | Dense           | Yellow     |
| 103496    | Jeollabuk-do        | Glutinous      | Extremely spreading | Dense           | Orange     |
| 103970    | Jeollabuk-do        | Glutinous      | Spreading           | Dense           | Brown      |
| 104574    | Gangwon-do          | Glutinous      | Half broom corn     | Dense           | Yellow     |
| 104594    | Gangwon-do          | Glutinous      | Medium              | Dense           | Brown      |
| 104963    | Gyeongsangnam-do    | Glutinous      | Extremely spreading | Dense           | Yellow     |
| 113294    | Jeollabuk-do        | Glutinous      | Spreading           | Dense           | Orange     |
| 134976    | Gyeongsangbuk-do    | Glutinous      | Compact             | Dense           | Orange     |
| 158264    | Gangwon-do          | Glutinous      | Compact             | Dense           | Orange     |
| 158265    | Gangwon-do          | Glutinous      | Compact             | Dense           | Orange     |
| 162843    | Jeollabuk-do        | Common         | Compact             | Medium          | Orange     |
| 162877    | Jeollabuk-do        | Glutinous      | Compact             | Dense           | White      |
| 180549    | Jeollabuk-do        | Glutinous      | Extremely spreading | Dense           | Orange     |

|        |                   |           |                     |       |        |
|--------|-------------------|-----------|---------------------|-------|--------|
| 180614 | Gyeongsangnam-do  | Glutinous | Compact             | Dense | Orange |
| 185760 | Gangwon-do        | Glutinous | Compact             | Dense | Mixed  |
| 185796 | Gyeongsangnam-do  | Glutinous | Half broom corn     | Dense | Brown  |
| 185807 | Jeollanam-do      | Glutinous | Spreading           | Dense | Mixed  |
| 185812 | Jeollanam-do      | Glutinous | Spreading           | Dense | Orange |
| 185813 | Jeollabuk-do      | Glutinous | Spreading           | Dense | Orange |
| 185816 | Chungcheongnam-do | Glutinous | Spreading           | Dense | Orange |
| 195442 | Gangwon-do        | Glutinous | Compact             | Dense | Orange |
| 208560 | Jeollanam-do      | Glutinous | Extremely spreading | Dense | White  |
| 208562 | Chungcheongnam-do | Glutinous | Extremely spreading | Dense | Yellow |
| 208566 | Gyeongsangbuk-do  | Glutinous | Extremely spreading | Dense | Brown  |
| 208567 | Gyeongsangbuk-do  | Glutinous | Compact             | Dense | Orange |
| 208568 | Jeollanam-do      | Glutinous | Extremely spreading | Dense | Orange |
| 208901 | Incheon           | Glutinous | Extremely spreading | Dense | Orange |
| 221619 | Gangwon-do        | Glutinous | Extremely spreading | Dense | Orange |
| 230297 | Gangwon-do        | Glutinous | Compact             | Dense | Orange |
| 235850 | Gangwon-do        | Glutinous | Compact             | Dense | Orange |
| 235856 | Gangwon-do        | Glutinous | Spreading           | Dense | Orange |
| 251882 | Gangwon-do        | Glutinous | Compact             | Dense | Orange |
| 262553 | Gangwon-do        | Glutinous | Compact             | Dense | Orange |
| 262554 | Gangwon-do        | Glutinous | Compact             | Dense | Orange |
| 262557 | Gangwon-do        | Glutinous | Compact             | Dense | Orange |
| 262566 | Chungcheongbuk-do | Glutinous | Medium              | Dense | Orange |
| 262570 | Gangwon-do        | Glutinous | Compact             | Dense | Orange |
| 262576 | Chungcheongbuk-do | Glutinous | Compact             | Dense | Orange |
| 264998 | Chungcheongbuk-do | Glutinous | Compact             | Dense | Orange |
| 270343 | Gangwon-do        | Glutinous | Compact             | Dense | Orange |
| 270346 | Gangwon-do        | Glutinous | Compact             | Dense | Orange |
| 270349 | Gangwon-do        | Common    | Compact             | Dense | Brown  |

|        |                   |           |                     |        |        |
|--------|-------------------|-----------|---------------------|--------|--------|
| 270366 | Gangwon-do        | Glutinous | Compact             | Dense  | White  |
| 278444 | Gangwon-do        | Glutinous | Compact             | Dense  | Orange |
| 278445 | Gangwon-do        | Glutinous | Compact             | Dense  | Orange |
| 286399 | Gyeongsangbuk-do  | Glutinous | Compact             | Dense  | Orange |
| 286403 | Gyeongsangbuk-do  | Glutinous | Compact             | Dense  | Orange |
| 286412 | Gyeongsangbuk-do  | Glutinous | Compact             | Dense  | Orange |
| 286423 | Gyeongsangbuk-do  | Glutinous | Compact             | Dense  | Orange |
| 286424 | Gyeongsangbuk-do  | Glutinous | Compact             | Dense  | Orange |
| 286446 | Gangwon-do        | Glutinous | Compact             | Dense  | Orange |
| 286448 | Gyeonghi-do       | Glutinous | Extremely spreading | Dense  | Mixed  |
| 297192 | Incheon           | Glutinous | Medium              | Dense  | Orange |
| 300032 | Gangwon-do        | Glutinous | Compact             | Dense  | Orange |
| 300088 | Gangwon-do        | Glutinous | Compact             | Dense  | Orange |
| 320893 | Chungcheongnam-do | Glutinous | Compact             | Medium | Orange |
| 320897 | Gangwon-do        | Glutinous | Compact             | Dense  | Orange |
| 320898 | Gangwon-do        | Glutinous | Extremely spreading | Dense  | Orange |
| 322510 | Gangwon-do        | Glutinous | Compact             | Dense  | Orange |
| 322513 | Gangwon-do        | Glutinous | Compact             | Dense  | Orange |
| 322530 | Chungcheongbuk-do | Glutinous | Compact             | Medium | Orange |
| 322531 | Gangwon-do        | Glutinous | Compact             | Dense  | Orange |
| 322533 | Chungcheongnam-do | Glutinous | Compact             | Dense  | Orange |
| 322546 | Gangwon-do        | Glutinous | Compact             | Dense  | Orange |
| 322549 | Gangwon-do        | Glutinous | Spreading           | Dense  | Orange |
| 322554 | Gangwon-do        | Glutinous | Compact             | Medium | Orange |
| 322555 | Gangwon-do        | Glutinous | Compact             | Dense  | Orange |
| 322558 | Gangwon-do        | Glutinous | Medium              | Dense  | Orange |
| 322570 | Gangwon-do        | Glutinous | Compact             | Medium | Orange |
| 322571 | Gangwon-do        | Glutinous | Compact             | Medium | Orange |
| 322572 | Gangwon-do        | Glutinous | Compact             | Dense  | Orange |

|        |                   |           |                     |        |        |
|--------|-------------------|-----------|---------------------|--------|--------|
| 322578 | Gangwon-do        | Glutinous | Compact             | Dense  | Orange |
| 322580 | Gyeonghi-do       | Glutinous | Compact             | Medium | Orange |
| 322613 | Gangwon-do        | Glutinous | Medium              | Dense  | White  |
| 322621 | Gangwon-do        | Glutinous | Compact             | Dense  | Orange |
| 322622 | Gangwon-do        | Glutinous | Compact             | Dense  | Orange |
| 329008 | Gangwon-do        | Glutinous | Compact             | Dense  | Orange |
| 329026 | Gangwon-do        | Glutinous | Compact             | Dense  | Orange |
| 329047 | Gangwon-do        | Glutinous | Extremely spreading | Dense  | Yellow |
| 329048 | Gangwon-do        | Glutinous | Extremely spreading | Dense  | Yellow |
| 329049 | Gangwon-do        | Glutinous | Extremely spreading | Dense  | Yellow |
| 329050 | Gangwon-do        | Glutinous | Extremely spreading | Dense  | Orange |
| 329053 | Gyeongsangbuk-do  | Glutinous | Compact             | Medium | Red    |
| 329056 | Gangwon-do        | Glutinous | Compact             | Medium | Orange |
| 329063 | Gyeongsangbuk-do  | Glutinous | Compact             | Dense  | Red    |
| 329064 | Gangwon-do        | Glutinous | Compact             | Dense  | Red    |
| 329074 | Gangwon-do        | Glutinous | Compact             | Dense  | Orange |
| 329076 | Gyeonghi-do       | Glutinous | Compact             | Dense  | Orange |
| 329077 | Gyeonghi-do       | Glutinous | Compact             | Dense  | Yellow |
| 329078 | Gyeonghi-do       | Glutinous | Compact             | Dense  | Orange |
| 329082 | Chungcheongbuk-do | Glutinous | Compact             | Dense  | Orange |
| 329085 | Gangwon-do        | Glutinous | Extremely spreading | Dense  | White  |
| 329089 | Gangwon-do        | Common    | Compact             | Dense  | Orange |
| 329090 | Gangwon-do        | Glutinous | Compact             | Dense  | Orange |
| 329108 | Gangwon-do        | Glutinous | Extremely spreading | Dense  | Orange |
| 329120 | Gangwon-do        | Glutinous | Compact             | Dense  | Orange |
| 329124 | Gangwon-do        | Glutinous | Compact             | Dense  | Orange |
| 331874 | Gyeongsangbuk-do  | Glutinous | Compact             | Dense  | Orange |
| 331878 | Gyeongsangbuk-do  | Glutinous | Medium              | Loose  | Orange |
| 331882 | Gangwon-do        | Glutinous | Compact             | Dense  | Orange |

|             |                  |           |                     |        |        |
|-------------|------------------|-----------|---------------------|--------|--------|
| 331889      | Gyeonghi-do      | Glutinous | Compact             | Dense  | Orange |
| 331894      | Gangwon-do       | Glutinous | Compact             | Dense  | Orange |
| 331896      | Gangwon-do       | Glutinous | Compact             | Dense  | Orange |
| 331899      | Gangwon-do       | Glutinous | Compact             | Dense  | Red    |
| 331904      | Gangwon-do       | Glutinous | Compact             | Dense  | Orange |
| 331907      | Gangwon-do       | Glutinous | Spreading           | Dense  | Orange |
| 331921      | Gangwon-do       | Glutinous | Compact             | Dense  | Yellow |
| 331922      | Gangwon-do       | Glutinous | Medium              | Medium | Orange |
| 331936      | Gangwon-do       | Glutinous | Medium              | Dense  | Yellow |
| 331937      | Gangwon-do       | Glutinous | Compact             | Dense  | Orange |
| 331938      | Gangwon-do       | Glutinous | Compact             | Medium | Orange |
| 331962      | Gangwon-do       | Glutinous | Compact             | Dense  | Orange |
| 331963      | Gangwon-do       | Glutinous | Compact             | Dense  | Orange |
| 331978      | Jeollabuk-do     | Glutinous | Spreading           | Dense  | Red    |
| 331988      | Gangwon-do       | Glutinous | Extremely spreading | Dense  | Yellow |
| 332014      | Gangwon-do       | Glutinous | Spreading           | Dense  | Orange |
| 332024      | Gyeonghi-do      | Glutinous | Compact             | Dense  | Orange |
| 332042      | Gyeongsangbuk-do | Glutinous | Compact             | Dense  | Orange |
| 332046      | Gyeonghi-do      | Glutinous | Compact             | Dense  | Orange |
| 340260      | Gangwon-do       | Glutinous | Spreading           | Dense  | Yellow |
| 340261      | Jeollabuk-do     | Glutinous | Spreading           | Dense  | Yellow |
| K276521     | Gyeongsangbuk-do | Glutinous | Spreading           | Medium | White  |
| 231310      | Gyeongsangbuk-do | Glutinous | Compact             | Dense  | Orange |
| Nampungchal | Korea            | Glutinous | Compact             | Dense  | Orange |
| Wheatland   | USA              | Common    | Compact             | Loose  | Orange |
| Sodamchal   | Korea            | Glutinous | Medium              | Medium | Orange |

**Table S2.** Statistical data of analysis of variance indicating the variation in biochemical and agronomical traits between sorghum genotypes.

| Traits      | Variable                  | Df  | Sum of squares | Mean of squares | F-value  | p-value  |
|-------------|---------------------------|-----|----------------|-----------------|----------|----------|
| Biochemical | TTC                       | 138 | 3584672.095    | 25975.885       | 803.380  | < 0.0001 |
|             | TPC                       | 138 | 1348.238       | 9.770           | 960.802  | < 0.0001 |
|             | DPPH                      | 138 | 20307.520      | 147.156         | 1668.727 | < 0.0001 |
|             | FRAP                      | 138 | 6879.263       | 49.850          | 375.984  | < 0.0001 |
|             | ABTS                      | 138 | 39256.241      | 284.466         | 475.357  | < 0.0001 |
| Agronomical | Stem height               | 138 | 962133.083     | 6971.979        | 114.187  | < 0.0001 |
|             | Stem thickness            | 138 | 2672.580       | 19.367          | 9.048    | < 0.0001 |
|             | Panicle length            | 138 | 14073.127      | 101.979         | 21.637   | < 0.0001 |
|             | Panicle width             | 138 | 195797.135     | 1418.820        | 16.128   | < 0.0001 |
|             | One-thousand seeds weight | 138 | 4007.725       | 29.041          | 425.371  | < 0.0010 |

Df: Degree of freedom; DPPH: 1,1-Diphenyl-2-picrylhydrazyl radical scavenging activity; FRAP: ferric reducing antioxidant power, TPC: Total phenolic content, TTC: Total tannin content.



**Table S3.** Variation of metabolite contents and antioxidant activities in sorghum landraces according to the collection area.

| Variable        | Values  | CB                    | CN                    | GB                   | GG                  | GN                  | GW                   | IN                    | JB                   | JN                  |
|-----------------|---------|-----------------------|-----------------------|----------------------|---------------------|---------------------|----------------------|-----------------------|----------------------|---------------------|
| TTC (mg CE/g)   | Minimum | 140.50                | 132.16                | 93.95                | 201.95              | 61.32               | 0.12                 | 178.53                | 26.24                | 45.76               |
|                 | Maximum | 343.04                | 300.13                | 409.72               | 428.95              | 350.38              | 388.25               | 231.28                | 415.58               | 377.60              |
|                 | Mean    | 226.18 <sup>abc</sup> | 217.92 <sup>abc</sup> | 247.92 <sup>ab</sup> | 273.73 <sup>a</sup> | 148.34 <sup>c</sup> | 234.40 <sup>ab</sup> | 204.91 <sup>abc</sup> | 181.65 <sup>bc</sup> | 157.86 <sup>c</sup> |
|                 | CV (%)  | 28.15                 | 28.33                 | 37.28                | 25.08               | 71.04               | 35.12                | 12.87                 | 66.70                | 64.40               |
| TPC (mg GAE/g)  | Minimum | 5.21                  | 4.64                  | 2.25                 | 5.76                | 2.86                | 1.17                 | 4.04                  | 1.57                 | 2.44                |
|                 | Maximum | 7.18                  | 6.45                  | 9.08                 | 9.31                | 4.70                | 10.23                | 6.89                  | 8.62                 | 8.83                |
|                 | Mean    | 6.11 <sup>abc</sup>   | 5.53 <sup>bcd</sup>   | 5.99 <sup>abc</sup>  | 7.39 <sup>a</sup>   | 3.48 <sup>c</sup>   | 6.39 <sup>ab</sup>   | 5.47 <sup>bcd</sup>   | 4.30 <sup>de</sup>   | 4.59 <sup>cde</sup> |
|                 | CV (%)  | 11.24                 | 11.58                 | 27.98                | 17.65               | 18.96               | 25.19                | 26.15                 | 40.97                | 37.20               |
| ABTS (mg TE/g)  | Minimum | 20.75                 | 23.05                 | 9.79                 | 25.67               | 4.92                | 1.84                 | 20.33                 | 1.64                 | 8.03                |
|                 | Maximum | 35.39                 | 34.42                 | 39.22                | 41.50               | 25.11               | 67.60                | 32.24                 | 41.89                | 31.51               |
|                 | Mean    | 26.18 <sup>abc</sup>  | 26.01 <sup>abc</sup>  | 26.78 <sup>abc</sup> | 32.20 <sup>a</sup>  | 13.00 <sup>d</sup>  | 28.77 <sup>ab</sup>  | 26.28 <sup>abc</sup>  | 19.07 <sup>bcd</sup> | 17.89 <sup>cd</sup> |
|                 | CV (%)  | 17.53                 | 18.68                 | 22.81                | 18.46               | 54.74               | 32.69                | 22.67                 | 53.74                | 36.33               |
| DPPH (mg AAE/g) | Minimum | 9.92                  | 9.58                  | 5.10                 | 17.68               | 2.44                | 0.89                 | 7.25                  | 0.48                 | 3.08                |
|                 | Maximum | 16.86                 | 16.25                 | 27.77                | 27.00               | 9.86                | 31.99                | 21.80                 | 23.80                | 17.41               |
|                 | Mean    | 13.54 <sup>bcd</sup>  | 14.30 <sup>bcd</sup>  | 14.80 <sup>bc</sup>  | 22.10 <sup>a</sup>  | 5.75 <sup>c</sup>   | 17.84 <sup>ab</sup>  | 14.53 <sup>bc</sup>   | 8.84 <sup>cde</sup>  | 7.92 <sup>de</sup>  |
|                 | CV (%)  | 21.28                 | 19.18                 | 36.95                | 14.56               | 55.20               | 34.86                | 50.06                 | 73.03                | 47.68               |
| FRAP (mg AAE/g) | Minimum | 7.16                  | 8.75                  | 3.57                 | 9.81                | 1.76                | 0.63                 | 7.84                  | 0.63                 | 2.27                |
|                 | Maximum | 10.76                 | 17.02                 | 16.31                | 17.68               | 9.28                | 20.38                | 12.16                 | 21.56                | 13.07               |
|                 | Mean    | 8.75 <sup>abc</sup>   | 11.35 <sup>ab</sup>   | 10.09 <sup>abc</sup> | 12.60 <sup>a</sup>  | 4.66 <sup>d</sup>   | 10.92 <sup>abc</sup> | 10.00 <sup>abc</sup>  | 7.70 <sup>bcd</sup>  | 6.85 <sup>cd</sup>  |
|                 | CV (%)  | 13.73                 | 29.10                 | 26.54                | 24.20               | 58.00               | 35.06                | 21.61                 | 71.11                | 44.08               |

Different superscript letters across a row indicate significantly different means ( $p < 0.05$ ).

ABTS: 2,2'-azino-bis(3-ethylbenzothiazoline-6-sulfonic acid) diammonium radical cation scavenging activity; CB: Chungcheongbuk-do; CN: Chungcheongnam-do; DPPH: 1,1-Diphenyl-2-picrylhydrazyl radical scavenging activity; FRAP: ferric reducing antioxidant power; GB: Gyeongsangbuk-do; GG: Gyeonggi-do; GN: Gyeongsangnam-do; GW: Gangwon-do; IN: Incheon; JB: Jeollabuk-do; JN: Jeollanam-do; TPC: Total phenolic content; TTC: Total tannin content.

**Table S4.** Variation of metabolite contents and antioxidant activities in sorghum landraces according to seed color and seed weight.

| Variable           | Values  | Seed color          |                     |                     |                     |                    |                     | Seed weight         |                     |                     |
|--------------------|---------|---------------------|---------------------|---------------------|---------------------|--------------------|---------------------|---------------------|---------------------|---------------------|
|                    |         | Brown               | Mixed               | Orange              | Red                 | White              | Yellow              | Large               | Medium              | Small               |
| TTC<br>(mg CE/g)   | Minimum | 46.94               | 164.88              | 45.76               | 153.66              | 0.12               | 61.32               | 76.45               | 0.12                | 0.48                |
|                    | Maximum | 383.50              | 267.16              | 428.95              | 409.72              | 140.75             | 415.58              | 428.95              | 415.58              | 383.50              |
|                    | Mean    | 158.53 <sup>a</sup> | 216.66 <sup>a</sup> | 240.03 <sup>a</sup> | 247.04 <sup>a</sup> | 62.34 <sup>b</sup> | 238.29 <sup>a</sup> | 243.99 <sup>a</sup> | 217.25 <sup>a</sup> | 208.98 <sup>a</sup> |
|                    | CV (%)  | 83.34               | 19.28               | 31.16               | 35.36               | 81.71              | 40.59               | 34.05               | 42.69               | 48.84               |
| TPC<br>(mg GAE/g)  | Minimum | 2.44                | 3.62                | 2.31                | 4.62                | 1.17               | 3.60                | 2.25                | 1.57                | 1.17                |
|                    | Maximum | 10.23               | 9.31                | 9.08                | 7.43                | 3.24               | 8.89                | 9.00                | 9.31                | 10.23               |
|                    | Mean    | 4.22 <sup>b</sup>   | 6.19 <sup>a</sup>   | 6.25 <sup>a</sup>   | 6.16 <sup>a</sup>   | 2.31 <sup>c</sup>  | 6.87 <sup>a</sup>   | 6.22 <sup>a</sup>   | 5.94 <sup>ab</sup>  | 5.46 <sup>b</sup>   |
|                    | CV (%)  | 55.93               | 38.08               | 20.87               | 17.80               | 29.15              | 25.87               | 24.29               | 30.76               | 37.27               |
| ABTS<br>(mg TE/g)  | Minimum | 7.68                | 18.23               | 7.39                | 17.80               | 1.64               | 14.86               | 4.92                | 1.64                | 2.56                |
|                    | Maximum | 67.60               | 41.50               | 43.88               | 28.95               | 24.44              | 41.89               | 43.88               | 41.89               | 67.60               |
|                    | Mean    | 19.14 <sup>b</sup>  | 30.27 <sup>a</sup>  | 28.05 <sup>a</sup>  | 23.62 <sup>ab</sup> | 8.17 <sup>c</sup>  | 29.69 <sup>a</sup>  | 27.34 <sup>a</sup>  | 26.28 <sup>a</sup>  | 24.90 <sup>a</sup>  |
|                    | CV (%)  | 98.13               | 31.45               | 23.65               | 16.50               | 88.71              | 26.97               | 28.77               | 34.96               | 53.53               |
| DPPH<br>(mg AAE/g) | Minimum | 3.08                | 7.27                | 1.75                | 15.01               | 0.48               | 6.24                | 1.75                | 0.48                | 0.89                |
|                    | Maximum | 31.99               | 27.00               | 27.77               | 20.54               | 5.38               | 27.55               | 26.28               | 27.77               | 31.99               |
|                    | Mean    | 9.26 <sup>b</sup>   | 15.65 <sup>ab</sup> | 16.45 <sup>a</sup>  | 17.87 <sup>a</sup>  | 2.80 <sup>c</sup>  | 19.31 <sup>a</sup>  | 17.10 <sup>a</sup>  | 15.47 <sup>a</sup>  | 12.46 <sup>b</sup>  |
|                    | CV (%)  | 102.75              | 53.18               | 33.70               | 10.96               | 64.37              | 34.88               | 36.18               | 45.76               | 55.14               |
| FRAP<br>(mg AAE/g) | Minimum | 2.26                | 8.01                | 2.12                | 6.84                | 0.63               | 5.39                | 1.76                | 0.63                | 0.89                |
|                    | Maximum | 20.38               | 16.80               | 17.68               | 10.77               | 5.54               | 21.56               | 17.68               | 21.56               | 20.38               |
|                    | Mean    | 6.31 <sup>b</sup>   | 12.66 <sup>a</sup>  | 10.63 <sup>a</sup>  | 9.26 <sup>ab</sup>  | 2.16 <sup>c</sup>  | 12.45 <sup>a</sup>  | 10.60 <sup>a</sup>  | 10.09 <sup>ab</sup> | 8.75 <sup>b</sup>   |
|                    | CV (%)  | 90.48               | 28.46               | 27.46               | 15.08               | 72.96              | 36.90               | 31.98               | 41.97               | 47.97               |

Different superscript letters across a row in a category indicate significantly different means ( $p < 0.05$ ).

ABTS: 2,2'-azino-bis(3-ethylbenzothiazoline-6-sulfonic acid) diammonium radical cation scavenging activity;

DPPH: 1,1-Diphenyl-2-picrylhydrazyl radical scavenging activity; FRAP: ferric reducing antioxidant power;

TPC: Total phenolic content; TTC: Total tannin content.
